# Supplementary material for: Magnetic bead-based electrochemical detection of interaction between epigallocatechin-3-gallate and STAT proteins
Source: Royal Society of Chemistry journal article supplement (doi:10.1039/c5ay00169b), 2015-01-01
Supplement: c5ay00169b1.pdf [file c5ay00169b1.pdf]

*Supplementary Information*

*for*

**MAGNETIC BEAD-BASED ELECTROCHEMICAL  
DETECTION OF INTERACTION BETWEEN  
EPIGALLOCATECHIN-3-GALLATE AND STAT  
PROTEINS**

**Nicolas Zeidana<sup>a</sup>, Han Sua, Milena Aitken<sup>a</sup>, Patrick T. Gunning<sup>b</sup>, Kagan**

**Kerman<sup>a\*</sup>**

<sup>a</sup>Department of Physical and Environmental Sciences, University of Toronto

Scarborough, 1265 Military Trail, Toronto, ON M1C 1A4, Canada

<sup>b</sup>Department of Chemical and Physical Sciences, University of Toronto Mississauga,

Mississauga, ON L5L 1C6, Canada

\*Corresponding author: [kagan.kerman@utoronto.ca](mailto:kagan.kerman@utoronto.ca)

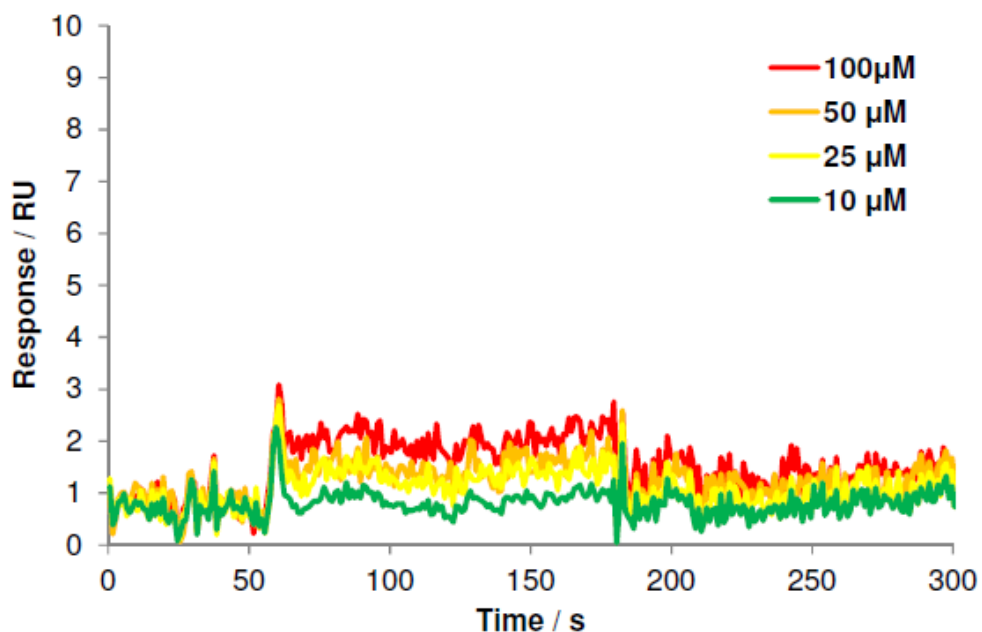

**Fig. S1.** Sensorgrams for the interaction between various concentrations of EGCG and 0.10  $\mu\text{M}$  His-tagged Lcl protein immobilized on  $\text{Ni}^{2+}$ -NTA sensorchips. No binding affinity was detected using the Biacore X100 Evaluation software. Other conditions were as described in the Experimental section.

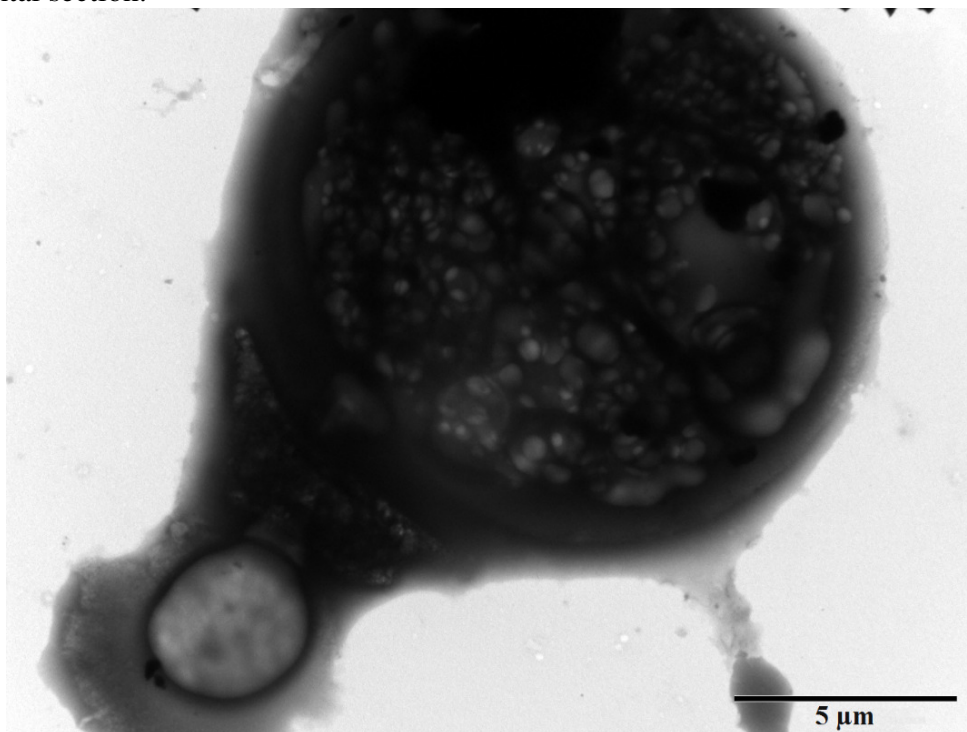

**Fig. S2.** TEM image of a superparamagnetic agarose bead which has been incubated in STAT5. Mesh like structure reveals bits of impregnated iron. The structure appears to be about 15  $\mu\text{m}$  which is approximately the proposed size of the bead.
